# Supplementary material
Source: publisher figshare collection journal article supplement (https://tandf.figshare.com/articles/dataset/_/12601162)
Supplement: Supplementary file 1 [file 1]

Archive with 2 entries (2 files):
- idre_a_1774670_sm9609.pdf
- idre_a_1774670_sm9608.pdf
